# Supplementary material
Source: Springer Nature journal article supplement (https://www.springermedizin.de/resource/supplementary/12974_2010_360_MOESM1_ESM.pdf/9601520)
Supplement: MOESM1 [file 9601520]

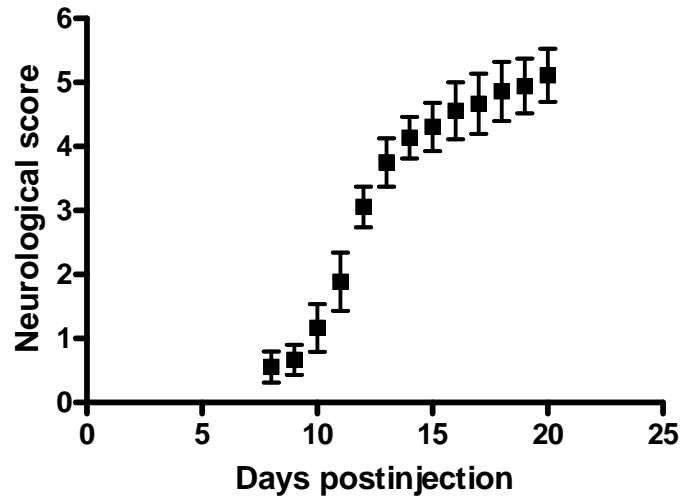

**Supplementary Figure 1.** Histogram showing the neurological score during the course of chronic EAE in mice.
